# Supplementary figures and images for: Regenerative medicine for male infertility: A focus on stem cell niche injury models
Source: PubMed Central journal article supplement — Biomed J. 2022 Feb 3;45(4):607–14. doi: 10.1016/j.bj.2022.01.015 (PMC9486244; doi:10.1016/j.bj.2022.01.015), 2022-02-03

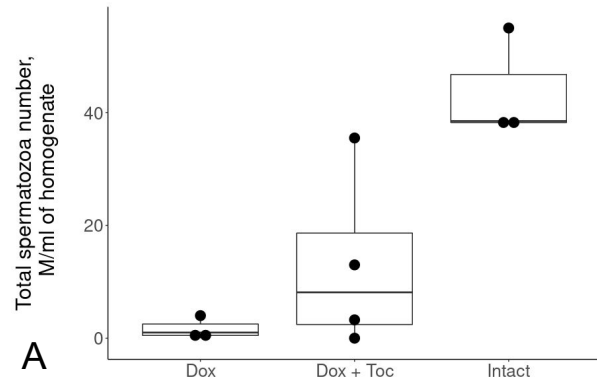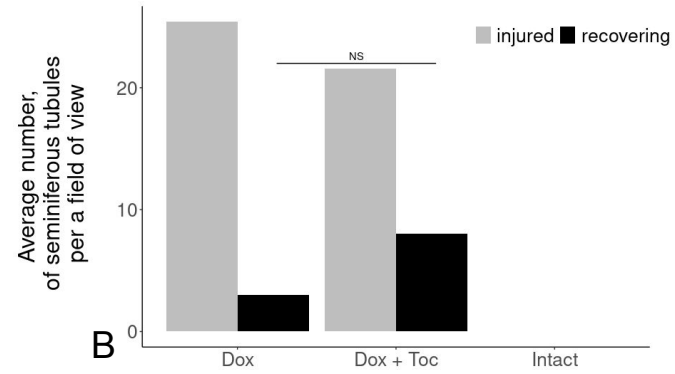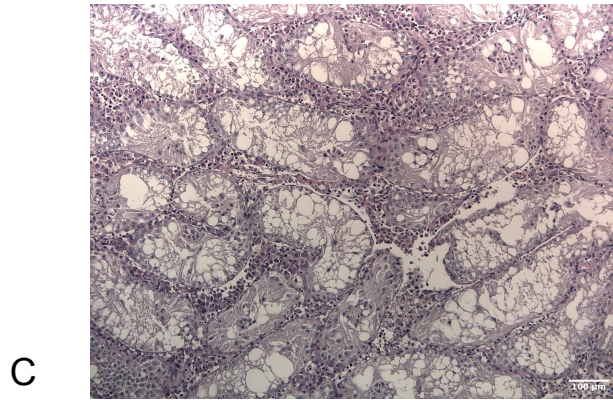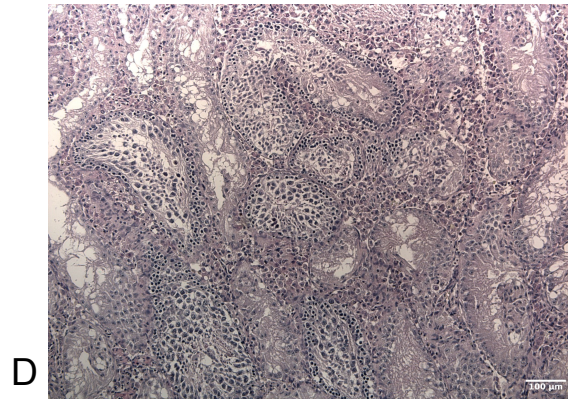

Supplement: mmc1.pdf [file mmc1.pdf]
